# Supplementary material for: Transcriptomic Analysis Reveals the Wound Healing Activity of Mussel Myticin C
Source: Biomolecules. 2020 Jan 14;10(1):133. doi: 10.3390/biom10010133 (PMC7023338; doi:10.3390/biom10010133)
Supplement: Supplementary file 1 [file biomolecules-10-00133-s001.xlsx]

## Sheet: DEG list
Name	UniProt Blast2Go	NCBI CLC	FC	FDR p-value
MytC_contig_121683	COX1_ANOGARecName: Full=Cytochrome c oxidase subunit 1; AltName: Full=Cytochrome c oxidase polypeptide I	tr|D3GA67| D3GA67_HALTU Cytochrome c oxidase subunit 1 OS=Haliotis tuberculata GN=COXI PE=3 SV=1	59.81	0.000187
MytC_contig_83353	---NA---	tr|A0A0B6ZZZ6| A0A0B6ZZZ6_9EUPU Uncharacterized protein (Fragment) OS=Arion vulgaris GN=ORF86150 PE=4 SV=1	15.6	2.31e-05
MytC_contig_151173	BAHG_VITSTRecName: Full=Bacterial hemoglobin; AltName: Full=Soluble cytochrome O	tr|K1PR28| K1PR28_CRAGI Cytoglobin-1 OS=Crassostrea gigas GN=CGI_10010717 PE=3 SV=1	14.74	0.0024
MytC_contig_43520	---NA---	tr|V4B732| V4B732_LOTGI Uncharacterized protein OS=Lottia gigantea GN=LOTGIDRAFT_207280 PE=4 SV=1	13.68	0.00705
MytC_contig_145071	---NA---	tr|V3ZIB7| V3ZIB7_LOTGI Uncharacterized protein (Fragment) OS=Lottia gigantea GN=LOTGIDRAFT_135415 PE=4 SV=1	9.92	0.03
MytC_contig_5938	---NA---	tr|V4AGE6| V4AGE6_LOTGI Uncharacterized protein OS=Lottia gigantea GN=LOTGIDRAFT_145534 PE=4 SV=1	9.22	1.2e-08
MytC_contig_40784	---NA---	tr|A0A0K0YB29| A0A0K0YB29_MYTGA LKD-rich protein-1 OS=Mytilus galloprovincialis PE=2 SV=1	7.55	2.31e-05
MytC_contig_136104	---NA---	tr|A0A0B6ZFC0| A0A0B6ZFC0_9EUPU Uncharacterized protein (Fragment) OS=Arion vulgaris GN=ORF61910 PE=4 SV=1	5.97	1.17e-05
MytC_contig_135551	VERL_HALRURecName: Full=Vitelline envelope sperm lysin receptor; Flags: Precursor	tr|G0YEP8| G0YEP8_MYTED Vitelline envelope zona pellucida domain 9 (Fragment) OS=Mytilus edulis PE=2 SV=1	5.87	0.000115
MytC_contig_146474	---NA---	not available	5.85	0.00171
MytC_contig_141026	---NA---	tr|G0YEP8| G0YEP8_MYTED Vitelline envelope zona pellucida domain 9 (Fragment) OS=Mytilus edulis PE=2 SV=1	5.17	0.000187
MytC_contig_53155	PGBM_MOUSERecName: Full=Basement membrane-specific heparan sulfate proteoglycan core protein; Short=HSPG; Contains: RecName: Full=Endorepellin; Contains: RecName: Full=LG3 peptide; Flags: Precursor	tr|K1QUM5| K1QUM5_CRAGI Titin OS=Crassostrea gigas GN=CGI_10019011 PE=4 SV=1	4.97	0.05
MytC_contig_137132	---NA---	tr|G0YEP8| G0YEP8_MYTED Vitelline envelope zona pellucida domain 9 (Fragment) OS=Mytilus edulis PE=2 SV=1	4.85	0.01
MytC_contig_135429	---NA---	tr|J9QWJ4| J9QWJ4_MYTED H5p (Fragment) OS=Mytilus edulis PE=2 SV=1	4.79	0.01
MytC_contig_73904	DNJB5_MOUSERecName: Full=DnaJ homolog subfamily B member 5; AltName: Full=Heat shock protein Hsp40-3; AltName: Full=Heat shock protein cognate 40; Short=Hsc40	tr|H6BD93| H6BD93_OSTED DnaJ/hsp40-like superfamily B member 4 (Fragment) OS=Ostrea edulis PE=2 SV=1	4.56	0.000425
MytC_contig_96193	---NA---	tr|A0A0B6ZQA2| A0A0B6ZQA2_9EUPU Amine oxidase (Fragment) OS=Arion vulgaris GN=ORF72394 PE=3 SV=1	4.49	0.00299
MytC_contig_135670	---NA---	tr|K1QU08| K1QU08_CRAGI Serine protease inhibitor dipetalogastin OS=Crassostrea gigas GN=CGI_10021721 PE=4 SV=1	4.31	0.03
MytC_contig_99492	---NA---	tr|K1QSK1| K1QSK1_CRAGI Tripartite motif-containing protein 56 OS=Crassostrea gigas GN=CGI_10008577 PE=4 SV=1	4.22	0.04
MytC_contig_136869	LDTI_HIRMERecName: Full=Leech-derived tryptase inhibitor C; Short=LDTI-C; Contains: RecName: Full=Leech-derived tryptase inhibitor B; Short=LDTI-B; Contains: RecName: Full=Leech-derived tryptase inhibitor A; Short=LDTI-A	tr|K1QLG9| K1QLG9_CRAGI Serine protease inhibitor dipetalogastin OS=Crassostrea gigas GN=CGI_10021720 PE=4 SV=1	4.21	0.000166
MytC_contig_74563	---NA---	tr|K1PY28| K1PY28_CRAGI Sarcoplasmic calcium-binding protein OS=Crassostrea gigas GN=CGI_10006807 PE=4 SV=1	4.02	0.00274
MytC_contig_32026	---NA---	not available	3.99	0.01
MytC_contig_34823	---NA---	tr|A0A0K0YAY1| A0A0K0YAY1_MYTCO RS-rich protein-1 OS=Mytilus coruscus PE=2 SV=1	3.62	0.000125
MytC_contig_34824	---NA---	tr|A0A0K0YB07| A0A0K0YB07_MYTCO RS-rich protein-2 OS=Mytilus coruscus PE=2 SV=1	3.5	7.06e-07
MytC_contig_35853	---NA---	tr|A0A0K0YB42| A0A0K0YB42_MYTGA Transgelin-like protein-6 OS=Mytilus galloprovincialis PE=2 SV=1	3.26	2.16e-05
MytC_contig_22493	DCST2_HUMANRecName: Full=DC-STAMP domain-containing protein 2	tr|V3ZF29| V3ZF29_LOTGI Uncharacterized protein OS=Lottia gigantea GN=LOTGIDRAFT_184492 PE=4 SV=1	3.23	0.00143
MytC_contig_12073	MYS_ARGIRRecName: Full=Myosin heavy chain, striated muscle	tr|Q9U0S5| Q9U0S5_MYTGA Catchin protein OS=Mytilus galloprovincialis GN=catchin PE=2 SV=1	3.07	0.00211
MytC_contig_65743	---NA---	tr|A0A0K0YAY1| A0A0K0YAY1_MYTCO RS-rich protein-1 OS=Mytilus coruscus PE=2 SV=1	3.04	0.01
MytC_contig_30352	CLPH_ONCVORecName: Full=Calponin homolog OV9M	tr|Q966V3| Q966V3_MYTGA Transgelin OS=Mytilus galloprovincialis PE=2 SV=1	2.95	0.00255
MytC_contig_90861	KY_MOUSERecName: Full=Kyphoscoliosis peptidase	tr|A0A0K0YB29| A0A0K0YB29_MYTGA LKD-rich protein-1 OS=Mytilus galloprovincialis PE=2 SV=1	2.93	0.02
MytC_contig_60714	MYS_ARGIRRecName: Full=Myosin heavy chain, striated muscle	tr|Q9U7E3| Q9U7E3_PECMA Myosin heavy chain OS=Pecten maximus PE=2 SV=1	2.88	3.01e-05
MytC_contig_40783	---NA---	tr|A0A0K0YB29| A0A0K0YB29_MYTGA LKD-rich protein-1 OS=Mytilus galloprovincialis PE=2 SV=1	2.83	4.6e-05
MytC_contig_25094	SOGA3_HUMANRecName: Full=Protein SOGA3; Flags: Precursor	tr|A0A0B6ZZ07| A0A0B6ZZ07_9EUPU Uncharacterized protein (Fragment) OS=Arion vulgaris GN=ORF85093 PE=4 SV=1	2.76	0.02
MytC_contig_19629	CLPH_ONCVORecName: Full=Calponin homolog OV9M	tr|A0A0K0YB09| A0A0K0YB09_MYTCO Transgelin OS=Mytilus coruscus PE=2 SV=1	2.7	0.000172
MytC_contig_268	MLRA_MIZYERecName: Full=Myosin regulatory light chain A, smooth adductor muscle	tr|M5AKJ3| M5AKJ3_PINFU Myosin regulatory light chain (Fragment) OS=Pinctada fucata GN=mrlc PE=2 SV=1	2.69	0.00255
MytC_contig_18832	---NA---	tr|G3GAE4| G3GAE4_MYTGA Small heat shock protein 22 OS=Mytilus galloprovincialis PE=2 SV=1	2.57	0.0024
MytC_contig_17930	PNCA_ECOLIRecName: Full=Nicotinamidase; AltName: Full=Nicotinamide deamidase; Short=NAMase; AltName: Full=Pyrazinamidase; Short=PZAase	tr|K1QBG5| K1QBG5_CRAGI Pyrazinamidase/nicotinamidase OS=Crassostrea gigas GN=CGI_10014709 PE=4 SV=1	2.57	0.03
MytC_contig_31755	---NA---	tr|A0A0K0YB07| A0A0K0YB07_MYTCO RS-rich protein-2 OS=Mytilus coruscus PE=2 SV=1	2.49	0.01
MytC_contig_49773	MLE_ARGIRRecName: Full=Myosin essential light chain, striated adductor muscle; Short=E-LC; AltName: Full=Sulfhydryl light chain; Short=SHLC	tr|U5Y6N6| U5Y6N6_PERVI Myosin OS=Perna viridis PE=2 SV=1	2.46	0.00228
MytC_contig_34500	MOXD1_DANRERecName: Full=DBH-like monooxygenase protein 1 homolog; Flags: Precursor	tr|E9JGS5| E9JGS5_9BIVA Dopamine beta hydroxylase OS=Azumapecten farreri GN=DBH PE=2 SV=1	2.29	0.00517
MytC_contig_14097	---NA---	tr|K1QKF7| K1QKF7_CRAGI Uncharacterized protein OS=Crassostrea gigas GN=CGI_10002637 PE=4 SV=1	-2.3	0.01
MytC_contig_70277	---NA---	tr|K1QLL8| K1QLL8_CRAGI Voltage-gated potassium channel subunit beta-2 OS=Crassostrea gigas GN=CGI_10022859 PE=4 SV=1	-3.22	0.000448
MytC_contig_69688	---NA---	tr|G0YGJ7| G0YGJ7_MYTED Senescence-associated protein (Fragment) OS=Mytilus edulis PE=2 SV=1	-3.4	0.00925
MytC_contig_68537	---NA---	tr|A0A0B7B2I6| A0A0B7B2I6_9EUPU Uncharacterized protein OS=Arion vulgaris GN=ORF157219 PE=4 SV=1	-5.44	0.03
MytC_contig_78409	---NA---	tr|F0V479| F0V479_MYTGA Putative C1q domain containing protein MgC1q42 OS=Mytilus galloprovincialis GN=MgC1q42 PE=2 SV=1	-6.42	0.04
MytC_contig_50243	---NA---	tr|A0A0L8FW82| A0A0L8FW82_OCTBM Uncharacterized protein (Fragment) OS=Octopus bimaculoides GN=OCBIM_22006067mg PE=4 SV=1	-7.4	0.01

## Sheet: Enriched GO terms
Tags	GO Name	GO Category	FDR	%test	%ref	FC test/ref
MytC UP	muscle thin filament assembly	BIOLOGICAL_PROCESS	0.00552208	5.12821	0.00778948	658.35
MytC UP	flight	BIOLOGICAL_PROCESS	0.012787	5.12821	0.0142807	359.1
MytC UP	adult somatic muscle development	BIOLOGICAL_PROCESS	0.0180148	5.12821	0.0181754	282.15
MytC UP	negative regulation of ATPase activity	BIOLOGICAL_PROCESS	0.0401099	5.12821	0.0305088	168.089
MytC UP	muscle filament sliding	BIOLOGICAL_PROCESS	0.00205094	7.69231	0.0545263	141.075
MytC UP	myosin filament assembly	BIOLOGICAL_PROCESS	0.000935181	10.2564	0.143456	71.4951
MytC UP	border follicle cell migration	BIOLOGICAL_PROCESS	0.0330032	7.69231	0.186298	41.2903
MytC UP	myosin filament	CELLULAR_COMPONENT	0.00158183	7.69231	0.0467369	164.588
MytC UP	muscle myosin complex	CELLULAR_COMPONENT	0.000341177	10.2564	0.0824386	124.413
MytC UP	stress fiber	CELLULAR_COMPONENT	0.012525	7.69231	0.121386	63.3706
MytC UP	I band	CELLULAR_COMPONENT	0.0318584	10.2564	0.520597	19.7013
MytC UP	actin-dependent ATPase activity	MOLECULAR_FUNCTION	0.00205094	7.69231	0.0545263	141.075
MytC UP	structural constituent of muscle	MOLECULAR_FUNCTION	0.00772833	7.69231	0.0973685	79.0021
MytC UP	microtubule binding	MOLECULAR_FUNCTION	0.00114505	12.8205	0.413491	31.0055
MytC UP	actin filament binding	MOLECULAR_FUNCTION	0.0100238	10.2564	0.353772	28.9916

## Sheet: DEG sequences
>MytC_contig_121683
CTGAGGGCATCTCCCGTAACTATGGTCCATAGGTGGAAAACTATGCGTAAGGTCTAAAGAGGCACAAAGACTTTTTGAACAAAATACAGGGCGATGGCTTACTAAGGCCTCTCATAGAATAATGACAAAGTACACCACAGAAACTACTGAGATTATTGAGCCAAGCCTAGCCACTCTGTTTCAAATAAACAATCTGTCAGGATAATCGGAGTAGCGGCGAGGCATCCCGGCAAGACCTAAAAAATGTATAGGGAAAAAAGTTATGTTTACCCCTAAAAATATAAGATAAAATTGAGCCTTCAGCCACACAGGGTTTATAGAAAGGCCTGTCATTAGGGGAAATCAGTGAACAAAACCGGCCATTAGGGCAAAGACAGCCCCTATTCTAAGTACATAGTG…
>MytC_contig_83353
ACCGATAGTGAACAGTACCGTGAGGGAAAGGTGAAAAGAACCCCGGGAGGGGAGTGAAAAGAACATGAAACCATAAACTTACAATCAGTAGGAGGACGACTAAAACGTCTGACTTCGTGCCTGTTGAAGAATGAGCCGGCGACTTATAGGTAGTGGCAGGTTAAAGCAGAGAATGCTGAAGCCATAGTGAAAGCGAGTCTGAATAGGGCGTTTGTCACTGTTTATAGACCCGAACCCGGATGATCTAACCATGGTCAGGTTGAAGCTTAGGTAATACTAAGTGGAGGACCGAACCGACTGATGTTGAAAAATCAGCGGATGAACTGTGGTTAGGGGTGAAATGCCAATCGAATTCGGAGCTAGCTGGTTCTCCCCGAAATGTGTTTAGGCGCAGCGGTT…
>MytC_contig_151173
TTTTTTTTTAACAAAGTATCGACAGAATATATTTTTTTATTAGCCTCCTTCAACAGAGCTGGACATAGGGACATCTAAAAAAAATAATAGAAAAACTGTAAATCTGGTACAATGCTGGGCTGGTGGGTTGTCCATGGTTCTCGCCAAAGTTTGTTTCCTTCCTTTAGTAATCCTCCTCCTGCTCTGCTGGCTCACTTGCTCTTCTCAGCCTCAAGGCCACGAATGTGCTCAGCCAGGAAATGGAATCCCTTCTTCCAGTGATCCAGGACCTCATCTGTGGCGGCATCTCCAAGGACTTCTTTGACAGCCTTGAGGAAGGAGCCTTCCATGGCACTGTATTGTTCCTCCAGGATTCCTCCAAGTTTCACATGCTTAATGGCAACGCCCCCAAAGAGCTCC…
>MytC_contig_43520
CCTTTGAGTTTCACTCTTGCGAGCATACTTCCCAGGCGGGATACTTAACGCGTTAGCTTTGATACTGCACAGGTCGATCTGTTCAACATCTAGTATCCATTGTTTACAGCTAGGACTACTGGGGTATCTAATCCCATTTGCTACCCTAGCTTTCGTCTCTGAGTGTTAGTAATAGCCCAGTAAAGTGCCTTCGCCATCGGTGTTCCTTCCAATCTCTACGCATTTCACCG
>MytC_contig_145071
GGCCACCGTCCTGCTGTCTGGACCGACCGACGCCCTTCTGGTCTCTGATGTGTCGCCAGCGGTGCGATTGGTCACCTTCGGGAGGTCCGCGGACGAGGGCGGATGAGACGCGCTACAGGTTCATTCCAACTGGCCAGTTCTGCTTACCAAAACGAGCCCACTCGGCGGCCGATGCGCATACGGGNNNNNNNNGACGTGCATTTCAAGTTTGAGAATCCGTCGCCGACGGTAGGGACGCCGACGAGAGCACCAGCTAATCATTCGCTTTACCGCACGCTACTGCGCCCGCCCGAGGGCGCGGCCGCCGGCTATCCTGAGGGATATTTCGGCAGGGAACCAGCTACCGGTGGTTCGATTGGTCTTTCGCCCNNATTTGCACGTCAGAACCGCTTCGGGCTT…
>MytC_contig_5938
ATGAACTCTTGGCTGCCACAAGCCAGTTATCCCTCTGGTAAATTTTCTGACACCTCTACTATTATGTCGAATAGTATTGCCCGTGTAATAACGGACACTATAGTAAAGGATCTTAAAGACACGTTTTCACAGCTCCGACTTGTACTGAAAGTCGAAGTCAAGCACACTTTTAACTTTATTCTCTAAATTAGATTTCTGATCCAATAGTGCGCACCTTTGTACACCTGTGTTATTCTTTAACAGANNCGCCCCAGCCAAACTCCCCACCTGCACCGGTTTGTTATCAAGTTCAGTAAACACGCAGTGATCATTACAGTGGTAAAATCCATAATAACCCACAATAAGGTAAAACCTCATGTGGATTGCATTTTCTTATAACATAAGCAAGTCAACAAGGAA…
>MytC_contig_40784
AAGCTGCAGCGTGAAGAGCATTTTTTAATATCAATTAAAAGTTGCAATTGGAAATCCAGAAGCCCCCTATATTGTTAAAGCATTCACGTATTGTCAAGTCAATGTCAAATTTACAGCAAATCACATTTAAATGGTGAACTCGAGCATAGTAGCATATTTACTCTCCTCATCTCCTTGAAAATTGGCTGAAAGTTTTACTTTAGAATTTGACCCTCGGTATTTATCCAAGCTAAATTTTGC
>MytC_contig_136104
CTGCTGATGACGTCATAGGGTCTGGAAGACTAGTTGTTCCTTCAAAGAAGATGTCCAAACTTCGGATCAATTTCTCAGCAAATTTCATTTTCTCAGGTGTTAAAAATTTCCGGAAGAAATCAACCATTTGATCAGCTGATTTGGCATCAAGGAAAGGCTTTAGCTCTCCTAAGACTTTCATTGCAAACTTGTGGATTACCTCCGTTAAATTAAGAGGAAAGTCTTTATTTAGTACTTTATCAATCGACTGGCGGTCTTTGTCCCCTTTGCCTTCTTTTTGTAAAATATTCTTCAAAGATTCACCAATATGTTGAAATAGAATGTTCTCTTCATATGGTAGATTAACATTTTGCCAGTTGTCTTCGTATATCATCACGATGAAGAAAGGGTCCATACATT…
>MytC_contig_135551
GGGTCCAATTTCTACTCGGCCGAATTGCAAGTCTTCTGGGGATTTAACAACGGCACATTAATGAATGAATATGAAACCTACACAATTTCCTGCATTTCCGAAGGAAATAAAACTGAAACTATGGCGTCGAAGACTATAGTCGAAGACTATATTCCCGTAGACAAACAGTTGGTTAAATCTCTCGGCCATGATTATGCAGGAAGTGCAACATTTGAATTGATTGACATTCTTGGTACAGCCATTGGTGATACAGTTGCCATGTCGAAAAAAGTTAGGTTGTTATTAACTGTCACGACCGCTGACTACCAAGGCGTGATTCCATACGATTGCAGGGCTGTCAGTTATGATCGTGGCACTAGCTACCGATTTCTTCAAGCTGGATGTGGAGATGGAACAATC…
>MytC_contig_146474
ATTTGCTACTACAACCAAGATCTGAATCAATCTCCAGCTCCCCCCAGATTCACACCCAAGGTTCATTGCTAAAGAAAGTCCAGCCTACATGCTCCGCCATCCTAGTCTAGAATATCTAAGTACTACAGTTTAAAGTTATCTCGGTATCCAATGTGTGGTTGCCAATCTTGAGTTTTCGGGGCTGATAGATTCGGTTGGTAGGTTGTTACACGGTTATTATTGAATGCCGACTTCTATGGCCATCATCCAACTGTCTATATCTATCAACACCCTTTGTGTCTGGACTAAACACTAATTATTTGATTATTTATTTATACTAACGGTTTATCCCGCCTTGCCTGATCTGCTTACCAAACCACGGCCCACTAAGAATTTAATATTTATTTATTTCGCACCGCG…
>MytC_contig_141026
TTGCGCTCACTTTTTCACGTTGGCGTTTCTGTTCCACTCTGATACAGGAATATGTGGCGATTACAAGTGATAACAACGCAACAGCTCCGATGCCAACGATTTCAAGGGAAGCAATCTTCAGACGAGTATCCATTTTCAGGTCGCTAAGTTCCTGTCGTGATTGGTCTAGACGATCTTCCACACGATCTTCTAAGCTTTGAATATGGTACAATGGTGTATTTACTTTCTCTTGTTCTTCTATCTCA
>MytC_contig_53155
ATGATCTACACAATGTTAATTTGACTCTGAACTTTCGCATACTATTCCTTTCAATTACAACAGTGTAAATCTGATTCATCATTAGTACCTATTTAAATGAGATTCTAGCACTATATTACACTTGTCCTTTGCTCGAAATGAAAACTCTTCCAAAGATACCTTGGTAAATTCATTACAACTTTGAACCTAAATTACATTATACATAATGAAAAAATTTGTTAAGGTCCTAGATATAACTTATTTACTCGGCTTCAAAGTACATTTCAGGTCCAGTGATGATTTCATCACCTTTACGAGAACCCCGGACTGATCCGACAACTCTTTCTTCCAGATAGATTTCATTATCAGCAGCAAGGTCTTGTCCGTACATCCTGTTTTTCTTACTCTTCTTCTTCTTCT…
>MytC_contig_137132
AATTCAGCAGAGTAGAAATTAGATTTGTTCGATGGGGTATTAAATTCACAGGGACATCCAGAGCTCGTATCGTTTGTGTAACACAGACTGAGGGTGGTTTCAGTATTGGTTTCATTAATTGGATTGAGCGTGACGAGACCTTGTCGACACTTGATCTGTGCTTGGACATATAGATCCGATTTGATGGTCACATTAGCATTTCGTCCAGAAAAGTCAGCAGAACCGCTCACCTCGCCACAGAATTGTGAAACATCCAAAATGTAGCCTTTCGGTACAGTAGATCTGACAGCAACTGCTAGCAGTAGACAGGTCAAAATCTGTATAATCAACATTCTGGTACGGTGGATGTGCTTCTTTTGATAACC
>MytC_contig_135429
CAGGGAGTGACAATAGCACTTTGCCGTGAGTTCAACCTTAAATCTTTCAACCCCACATCATGAGATGAAAATAAGATCTTTGGACGAATTTTGCTCTGCTAGAGTGGTAATGAAAATTAGCATTATTCGAATTTCTTACGACACTAAAAAATGAGGAACCGCTTCTACTTATGGAATTAAAAATTTCTGATGCAGATTTAAGTGTATACCAGCATCGATTCCAAAAATTACAAACTCTTTTCGTCTCGGCTTGACCCTTCATATTATTCTCAGCTTGTGTTTTACCCATGACTGCACGGCTCTTGTCCACACTACCCACTACAATGTTTCTTCCATTTTTTCTAAATTTTATGTGTCCTCCACTAACCCCTACATAATGAAGGTTACTACCACTTATGG…
>MytC_contig_73904
TTGGCAGGTTTGACAATTTTGGCAGGTTTGACAATTTTGGCAAACATGATCAAACATTCTTTCATTTGTTTCCAGTGTCGTTTCAATTATCCATTTCATGTTAACCAATGATTATTTAAGGCATCGTCTTAAAGTGTTTCTCTGAATGGGTCTCCTCGATAATGGAATGAAGTATAATTTCGTCTTGCAGGTTTATACCTTCGCCGACTATGAGCTCTATCCCTTCCGACGTCGGCAAAAGGTTCGAAGTCATTCATCATATCCTCAATATTTGAAGGTCCGAATGAGTGTGCCATAGGCTCCTTTTCAAATTCTTGAAATACATGAAAATGTTCTTCAAAATGTCTGTCGAATAATGGCTCCTCAAAGTGCGAATTATGAAACACATTAAATGGGCTT…
>MytC_contig_96193
ACACTCATAATATAACAGATTTTCATACTTTCACGCATATGTGTACATAACTTATAGACTAATGTAACTTGCAACTTTTGCTATTAAGTTTAATTTCTAAAAAATGAAATTACAAAACATTCCTAAATTTCTAATCTATAGACCTACGGTACCTATTGATACACCGTTATAATCCGAAACAATAGGTACCCGGTTGTAGACTAGAACTTATGAGGGGTTAATCATACTTATCAAAACAGCCAGTTCTTAGCCATTTTGTTGTCACTTGAATTCGTGTTAGAGTGAAATATTTCGATGAAAAACATGATAAAGCTATATGTTTAGTTTCTGATTTGATCTGCTACGATGTAACAATAAATTGCCTTTTTAATTGGAAATATATATAATACAACCCATCAA…
>MytC_contig_135670
AAGCCATAGTACGAAGAAAGAAAGAAACATGTATAAGTTACTTGCTGTCCTCCTTGTAGTAGCTGCACTTGGATGTGCAGTGAATGGATGCGTGTGTCCTAGGACATACCTTCCTGTTTGCTCCAGTCTGGGAAACTCGTATGCAAATAGCTGTACATTTGCATGCTTCGCTGATGAAGGTGAAACATTCGCCTGTGATGGCTCTTGTCCTTGTGCGACATAGATTTCTGAATCAAAAAGGACTTTGGAGTATGGAAGAATTTGAAATTGAACACTGGACTTTGAAATGCATAATGGAAACTTTGTGTGACTTTTAATAATAATCCTATTCATCTTCTGCATAATTAATCTGACTTCTTCTTGTTTCAATAAAAACTAAAAT
>MytC_contig_99492
CTTAAATATCCATTTCAAGGAATTTTACTTTCCTGAAATCAAAAATTAATATTGTCATGATTGTCATCATCTGATATTATTCCATCCACATTAAATATGCTTTCTCCTCAATATAATGTTTATATGTTGTGGATATACTTGTATAGATCATCCGAAACGTTCCCTCCGAAACTTACGTCTGGAGTAGATAATTCTTGGTTTATGCAATAACACAGGAACTTTTTGACTCTTCTTTCGACTGAAAAATATCAAACGGTTTGTAAGTAATCTGAGATAGGCGTCTTGTAGTCATGGTTACTAATAATGAAACGAATTGTCATGGCAACATGTATATATACTTCATCCAAAGCTCTATCACTTATCTTCACCAACAGTCTAACTAATATACATGAACTCCAT…
>MytC_contig_136869
ATCAATCACCATATAAATCACAAACTTGTTCAAGAGGAAGAAATCAAGTTCAATGTGTCCAGTCTTTTGAATCCAATACCAGTCCTGTTACAAATTGTTGAGGCTACTACTTAGTTGGACATACTCCACGTGATGCCACTACTTCACCAGGATTGCAGTTCAGTACACATTCGTTGGAATATGTTTTTCCAGTCATGGAACACACTGGATCATATATCATACCACAAGCACACAAAGCATCTTCTGTTGCACACGTACATCCCAAAACAGCAAGCAACAGACAAACAGTAATGAACTTA
>MytC_contig_74563
CCTTCTGTGCAATTGTTTATACCAAACAAGCCTTGTATGTTTCATATACAACATCATTCTTCGATGGATCATCATTGGTGAGAAATAGAAGCCAGTCTTCAATGTATTCCTGTATCGGAACCATACCATGGCTTGGTTTGTAAAGTTCGAATGCCTTCCTAATGAGAGCCTCGTTGTCATGACCATATANNTTATATGCCTTGACGTAGTTATCCAGTGAAATCATTTTAGTCTTGTCTGTATCCAGAATGCAAATAATGTCTTCACACAAGGCTTTCATTTTTGCGATAAAATTTTTCTTGTTTTCGGTATACCCTTTTTCTAAATCTTTTAAGAGGTCAGCCTTGGTTATTTTATTATTCCCTTTAAGGATGTATTTCTCCCACCATGCTCCTATTT…
>MytC_contig_32026
TTTTTTTTTTTCTTTAGAACAGCATTTTATTTGATAACATTTTCATAAAAGAGGTAAAGCATGGGGCAGTGATAATAATACAGAACATCACAGCAAATAGCTCCGGTGGGATTATTCCGGTGGNNTACTGGGGGTCTTTCTTCAGACTTGCTGGGTAAATGACAAAATTTTCCTTACAGAGCTGAAATACAACTATGAATTATAAATTTATTCACTTTGATAACATTAAGGAAGTGGTAATTATTTTTCTGTAATTATCAAAATGAATTTGTTTATCACAGAATAATTTTGTCTTTCTTATCTCATTGAATGTTATATATCATACTGATTTGTCTTATA
>MytC_contig_34823
CAAATTTAGGTTTTTTTTTTTTTTTTTTACGCAAAAGACGATTTAATATAGCAATACTTTCGTACAATAGTTGTCATCAGACCAACAAACCGCAAGTGACAGTAACACTACAGTATCACAGAAGTTTTAAAACATATACGTATAACATTTGTTTATTAAAATATATCAAATTGATATCAGAAGTGAAATCTTATAAATAAATATATAATATATCTGTTTTGTACAATATAAGTTATAATATATTCTTTTCTAATTTACAATTAATCTCAATTATGCAGTCGTATTTTCGATTTTTTTTATTGCTACGGTTCACATCGCTGGATAATTGTCCCGTCTTCATATCGAAATGTGTTCTTGTACAAAAAGAACATTTTCTGAACATCAGTGTTTTGTGTATCA…
>MytC_contig_34824
CTACTTCCCGACGTTCCAACCAGGTAGTTGTAATTCTAAATAGGCCTGCTTTTCAAGGACGCTCCCGTGTCTTCTATGCCAAGTCACGAGCCCCGGCTGTAAGGGAGCAGTCAATGCCACCGATTAATTTCGCCCGAAATATAGTTATTTCCCCTATGGAAGAACTAAGAGGACGAGTTGCTGCCAGAAGAGTCATCAATACAGTCACTGGTTCATTTTTGCTTCCAAAGTACCAACCTTACCAGTCAATGTACCAGCCTTATATATCAAGTTATCGACCTACGAACATGCGTCGGTACCTTGCTACTTTAAAAGATGTTATACCAAGCAGATACCCAAGCGAGGGCTTGTCATCATCTTTAAAACGCAAAAAATATAGAAAGGCTGCACTTGTCGGAA…
>MytC_contig_35853
GAAGGAAGGGTTTCAATCTTTAGAATAATCAGAATTTCAAGATGTCTGGAAGTGGTCGTGCAAATAAATCCGGCTTGGGATATGAAGTGGAAAAGAAGATGGAAGCGAACTACGACCGAGAGGAAGCAGCANNNNNNGGACGGTGTTGCACTTTGCAAGTTGATCAATATTTTATTGAAAAAAGATGGAAAATCACCAGTCAATTTCCAAAAGAAGGTCATGTCACCCTTCGTTGCCATGACAAACATTGAAAACTTCAACAAAGGCATTCAAGATTATGGCGTAGACANNNNNNNTCTCTAGCTTAGGATTTGTTGCAAACAAAAAGGGAGTTACTCCAAAATACACAGGAGAAATCCGTAAATACTTGGACAACGAATAGATGTGATACAAAATGCT…
>MytC_contig_22493
CTTCTCTGGAATATTGACTGGTGGAATACTGTTTGTTCTGCTAATCTACAGTTTTGGTTTTGCCTTGGATATAGCTGGGTATATATCTATTGGAGTCACAGCCCTAGCATGTCTAGGTCTAGCACTATCTGTCCATGTCCGCTGTATCGTGGTATTGATGATTCCTAGTCTATTTACTGGTAGAGGAAGGGTAGCCATCTTGGCAGTTATATTGGGACTCCTGTTATCAAGACCAATCAAAAACATCTCTATAAATACTTCAGAAGTGTCAAGAAGTATGGCCTGTAGTACTGAACTCTTTCAGAATCAGTCACACTCTCTCAGACAACAGCTCCAGGTACCAATAGAGCAGATTAAGGAAGCTTTAGGTAAACAGGCAGAGGATATAAAGAGGTTAGG…
>MytC_contig_12073
TTTTTTTTTTGACATATACAGCTTTAATGTATTCAAAAAATTTGCACAACAAAAACTGTTGTATCTGTTACATATATCCTTATGAGGGATCATACTATATTAAATATATACATGTTATAATTCCATGAAGTTCCAAAATAAACTGCAGTCAATAAATTAAATTTTAAAACTATAAAACCTATAAAATAAATAAATTATAGTCAACAATGAACCACAATATCCTGGCAACTCCACGGGTAAGAATGTTGTTGTTCCTTGTGTAGTAGCTGGTCAGATGTTAACATGTAGATATTCAATAATGATTTTCCTCCTCATAAGAAGGAGTAACAGAGCGACGATAAAGTCCAGTTCCACGAGATGCAGATCTAGGCGATAGCAAATTACTAGAATTTAGTGACG…
>MytC_contig_65743
TTCCCATCTCAGTATCTCACACTTAAGGATTATGTTGTTCCATATCTACATACATATTCATTATTTTTGTTTTTACGTCAGTATCTGTGTCATCGTTAGGTAGATATCTATCCATTAGTTGTTTATGGCGGTCCATCTGTTCCTTAACGTGAAGAAGCTTGTCTCGTACATGACCTATCGTCTTTATGGGGAAAAAGTAATCACCAGGAGGAACACGGGATTCAATGCGATACTTCCATGACATGAGGTTTTTTGGTTTTGTAACGTGGCCCTCTTCATCCCAGTGCGACTTTCCACCGTAGAGTGG
>MytC_contig_30352
TAAAATTATAACATTTTATTCGATCACAACATAGCAAGATTTTTACAATGTTTTACCATGTACGTACAGAGTAATAAATAATTTGTTAAAAGTTTATCCTATATAATACAGTACAAAAATAGTCATTTAGGTATCCATCAATGTAAGAAGTTTTTTTCACATCTTTGACAGATGAAAGACTGTGCGGGTCCGGATATCCGCTTTGCAGGCCTGCCGAGAAAAGCACAACAATCCGAGGGGAGCAAGCGAAGACAAGCGACAGAAAAAGAAGAGTCTAAGATTTGATTGATAAAAATATAAAAAATAAAAATTTATATATTTTTCTCAATGATATGAACTTTTTACCACAGGCATGGACATAATTATAGGTCTTGAAATTTTGTTCCATGCATTTCTCAA…
>MytC_contig_90861
CGTAACTTACAGAAAATAACGATAGAATCGTTGCTAACATAACAGGCTATTGGTTACCACTGACAGTGTCGTCGCATACATATTTCTGGATTGCTATTTTACTTGCTTTTACTTAGAAGACATCCTAAAGATAGACTAAGTACGTTCGAGTAACAAAATGGCCGGAAGAAAGCCAGAAATCCCCGAAGGCTACCTTGGACCCCAGGAAAAATGGAATGAACTTGGACTTAAAACCATGACCCATCCGAATCCAGAGATTATTGCACGGGATAATCATTTGAAAATTGAAATAGCGTCGGAGACGACACATATCAAAATTACATACCAACTTATCCACTGCATCTCTGAAAAGGAATATTCAGAATATGTCTTTGCTCAGATGAAAGAAGGCATCATCCA…
>MytC_contig_60714
CTTCTGGCCTTGTGTAGTAGTTTGTCCAGAGCTCAGACGATCTTCACATTTCTCCAGTTTCGGTTATTACTATTCCTGTATTTTGGAGAATTGTCACCTTAAAAAGTCAAGATGTCGTACATGGGAGTACCCAAAGATGACCCGGATTTCCAGTACTTGTGCGTGGACCGGGTCAAGTTAATGAAGGAAATGAAGGAATTCGATGGTAAAAAAGCTTGCTGGTGCCCAGATGATAAAGAAGGATTCATTGGTGCTGAAATTCAGTCTTCAAAAGGAGATGAACTTACAGTTAAAATTACTGAATCCCAACAGAACAGGACAGTAAAGAAAGATGACATCCAACAGATGAATCCACCCAAGTACGAAATGAGTGAAGACATGGCTAACTTAACATATTTG…
>MytC_contig_40783
TTTTTTTTTTTCGAGCTATTATTATCTGCGAAGTATGCTTTATTTATATCTAGATATCTAGAGATAACATATCAGATGCCATATGAAATTGGTCCAAAGTAAAGTAGAGCACAATCTTCGTTACCAACAGTTAAAATCCTATGCAAGCTGCAGCGTGAAGAGCATTTTGATGTTGCCAAGAACAGAAGTTGTGGTTAATAGAACAGAGATCATCCAAACATTGCAAAAGCTTTAAAATAATGTCACAGTTTCTAACTATATGTATAAAGAGTCATGCAAGTCATCATTAAAGAAGATATTCCAACAATGTGGAATATTTACTCTCCTCTGCTCCTTGGAAATTTGCTGAAAGTGTAACTTTAGAGTTTTTTCCACGGTATTTATCTAAGTCAAATTTTG…
>MytC_contig_25094
TTTTTTTTTAGCAAAAAACTTTTTTATTTTTTTAAAAAGTCTGAACGCGAGTTTTGAGCATCACATATAAATTATCAGTCGGTCTGTAAACTCATGCTACTTTTTGTTAGTTGCGAAAAATTTGCTAATTTAAATTAACCGTTGCACATTTCTTTTCTTCTATTAAATGGAAATAAAACACGAGCTGATTTTTCTCAAATGTAAAAACTGATATGTAAATCGAAGAAATGAAATGTGTTCTTAAATGCTTTAAAATTCGAAAGTTTTGTTTCGTCGGAACGATTGACACACACACTGCTGCTGGCTTTCTTCTTGGAGCGCCCTCTATGATGATGGCTGAGATGTCACATGATAGCACATGAGATGTAGGGATGTGTTCAACCGTCGAAATGTCAAAAC…
>MytC_contig_19629
TTTTTTTTTTTTTTACTATTTTGCATCTTTATTTTTCATCCATACATCCTGTTATTTCGCAACCCAAAAAATAATTATGAAATCATGTTCTAGTATAATGATCCTCGTAAAAAATATAAGGATTTTTCAATCTTGTCGCTTTTTTTAAATATTTTGAAGAAAATGCCTACGAAATTATAATCATTTTATCTTTCTCTTTCATTTCTATGGAATAAGCAAGCATCTAAGTGGTTCAAAATTTATGCGAAAGGATTTGCAGTTTATTTGAAGATTTCACCACCCCCTTTTTAAAGAAATAAAATTAAAACATTTATATTTACAACTTCATTTGACCAGTTCATTTTAATGTTTATTCGTTGTCTTCTTCGGGGATCTCTTCTTGTTGTTGTACTCTTGGAG…
>MytC_contig_268
TTTTTTTTTTTTTAACTCTGTGCACAGAGGATTTTTATTTTTATACATGTAAGAAGGTTACAGGTAACACTCCACTCAGATGTTCTTGGTCACCATAATTACTATAAGATATCACAACTTTTACATGTACCCTTATCGGTAAAAAGTATACCATGTGGTATACTACTAACCAAAACAAGTAAGTAAAAAGTACAGTAATTATGGCACCAGCAGTAGTTCAAGTACTTGTCTACTGACAGCTTACTGACAGACATCACGCATTCTTCCAGATTAATATCCCCGGGGATAATTATTGCCATGAAATGACAGGTCATTTTATACAAATCATGTTCACATATAATTAATAAATAAATAAAATCACAAAAGAAGGGAATAGTTCATTTCTATATTAAAATCCCC…
>MytC_contig_18832
CTTCAAATTATTTTAATAAATTTCACTGAACAACACATTTAGTGGTCACCGTGGTGGTGTCACATTGTATTTTTCTTTTTCATTTAAAAGATTACTTACGAATAATTGCTTATACCTTTTTATTTTCATATACAACTGAATTCAAATAATTGTCTTGTCACGGAAACCGATCCAGGAATGCTAGTCCAAAACATGCACAACAACATATGCAAAGCTAGTACGAAACCATATATGTAAAATTGTTAAAATAGTTAAAAACTGCAAAAAATACTGAATAAATTGTCAAATTTTGCGCACTATCCAAAGTCTCTGAAAGTGTACATAGATGTCAATTCATNNGTCAAAATAATTTCTCACTGATGGTTTCCAACACAGCATGTTATATATAATTGGCATTTT…
>MytC_contig_17930
ATCTGGTCACGTTACTTTTCCCTCTGCTACAAGGGTCCTGGCTAATGCCACATTTTTGGCAGTCTGTAAACCAAGTTGAGGTGGTCGGTCATGAGCTTCAACAAGATCTTTAATCTTGCAGGAATGACTTATGACAGCACCATTGGTCTTCAGATTCTTCCTCATTTCATCAATATCTGTCAGATCTACACCTCGACAGGCATCCTCAATTAGTACTGTCCTAAATCCATGTTCTACAGCATCTAAACAGGTAAACCCCACACATACATCATATGCCACACCACACACATACACATCAGTAACCTTGTGTTTTGACAATATTTTGACCAGATCTGTTTGGGATTGCCTATTGTTGTCCCAGAATGCTGAGTAACTATCCACATTGGGATGTGTTCCTTT…
>MytC_contig_31755
CTGGTTGGAACGTCGGGAAGTAGGAGGGCAGGATACAGCTCGGCTTGTCAGTGGCGCGGGTCTGGCGACAACCGATGTTGCACGTACCCGGTTTGAAGTCACTGAAGATCTAGGTGATACATATGTCTCTGTGTCAACAAGTGCCCTTGCGGCGTCCCTCAACAGCATTTGGTCTCTACTGCGTGATTTGGCTGCTACATCGTAGGTGTCATCCATTAAATTTGATGTGTAAACCAGCTCATCGTTGACACCTCGTCTAATATCGTTCTCCTCTCTAGATGTGTCATAATATGATCTTGGTCTGATGACCTCGGGGATAAAGGTATCCTCGTATAGGGCAGATCTTGATTGTGGGGCATATGACCATCTCTTGAGTGCTGAATGTCCTTTTGTGCTAGC…
>MytC_contig_49773
CTCTACATGAACTCGTCTTATAAATAGACGATACTGCATATCTGCAAACACACGGCATTCCAATCATTCCGTCTTCCGACATCACTTTCACTTTTACGACCGACGGCAACCTCCAAGCTTCAAAATGTCGAAGTTATCAAAAGGCGAGATCGAAGACGCCCGTGAGGTGTTTGACCTTTTTGATTTCTGGGATGGTCGGGACGGAGATGTAGACGCATGTAAGATCGGTGATGTGTGCCGGTGTCTAGGAATCAACCCAACAAATGCTGTTATCAAGAAGAATGGCGGCACAGAAAAGATGGGTGAGAAAGGCTACAAATTTGAAGATTTCCTCGCTTTTTATGAAACTGTCCAACAACAGACAGAACAGGGTACATACGCCGACTACATGGAGGCATT…
>MytC_contig_34500
GAAACACACATCTCTTCTTGTGTTGATAGACCTCCTATTGTTGGTTTGTTTCTTCTCGATGAGTCGTATGTACATTCAACAATAAAGCTGTCACCGCGTTTGACCTCTCGTTCTTCTTTTAAAACCCGGACATCTTGGTAATTAAAATCATAATGGTCATCCTCAGCAATCGGTGACAGTTCAGTTCCGTTTCTAATATGCCGTGTTTTAATTCCAGCACCTAATAAATGAGCATGTTGTAAGAGGCCAAAAATCTTAATTCCAGTTTCTGGTAAACCCTTTTCAGTACACTCTGGACTACAATATCCCGTAGACAAAAAAGCTTTTTGGTATGGTGGTATAAAATGATTTGGATCGACATTGACTCCAAGAGTCATACCGGCTGCATCAAACTGACGA…
>MytC_contig_14097
TCTGGGTTGTTTCCCTCTCCACAACGGACGTTAGCACCCGTAGTGTGTCTCCCGCATATCACTCATTGGTATTCGGAGTTTGCAAAGGGTTGGTAAGTCGGGATGACCCCCTAGCCTTAACAGTGCTCTACCCCCAATGGTGTTCGTGCGAGGCTCTACCTAAATAGATTTCGGGGAGAACCAGCTATCTCCCGGCTTGATTAGCCTTTCACTCCGACCCACAAGTCATCACCGAATTTTTCAAATACGTGTGTCCAGTCCTCCAGTTGATGTTACTCAACCTTCAGCC
>MytC_contig_70277
AGTTCTCTCAAGCGCCTTAGTATTCTCTACCTAACCACCTGTGTCGGTTTGGGGTACGGTTCCTATATATCTGAAGCTTAGAAGCTTTTCCTGGAAGCATGGCATCAACAACTTCAATTCCGTAGAATCTCGTCTCGTATCTCAGCCTTAAGAAGACCCGGATTTACCTAAGTCTTCAGCCTACATACTTTCACACGGACTACCAACGCCGTGCTTGTTTAGCCTACTCCGTCCCTCCTTCGC
>MytC_contig_69688
GGCTTATGCCATTGCACTAACCACACGATGTCCAACCGTGTTTAGCCCACCTTCGTGCTCCTCCGTTACTCTTTGGGAGGAGACCGCCCCAGTCAAACTACCCACCAGACACTGTCCATAATCCCGATAAGGGACCAATGTTAGAACATCAAACATACAAGGGTGGTATTTCAAGGACGGCTCCACAATATCTAGCGACATTGCTTCAAAGCCTCCCACCTATCCTACACAATTAGGTTCAAAGTTCAGTGTAAAGCTGTAGTAAAGGTGCACGGG
>MytC_contig_68537
CTTCCACCAAAAAAGGTCTTTTTAATTTGATATTTATTTTTCTGTTCAAAATTGTAAAATGTAGATATTAAAAATAAGGTTGCACTTCCCCTGACTAAGCCCCATTGAGTTCCTACCCCATAGGTAGTACTTGCATGACTGTGCTATGACTAACACCTGACCCATCCTCAGCTCAGTCCAAAGACCTCACGGCTGGTAAAGAGGACTCGGGCCAGGATGCAGTGTACTACTGCTGGACACTTTCTGCCCTTGGTCTGGGGACTTTTCCCAAGGCTT
>MytC_contig_78409
GCGAAATGTTTCATCCAGTGGTACATCCAGTAAAGATTAAATATTTTGTGTAAGCATTTTTATCGTCCACTTCCATGAAAAAACACGAGTGCACGAGTTATTTTAAATATGCTTTTATTTATTTTAATGATATCTTCTCGTTGACGACCCACATCATTCTTTAATGACTGCAGTCGAGCCACATCATTCTGCAGTCGAGGGACTTCATTCTGCAATGACCGCAGAATAGCCAGATCATTCTGCAATGACTGAATCTTATTTACGGATTCTTTGTATTTATTTTCAAGGTCATGAAATTCCGGGAACATTTCCAACACTGAATGTTTGGTCGATCCGTAAGACAGAATTGAAAAATTGAACATCAAAAGAACAATACACACAAGATACATTTTCTTCATT…
>MytC_contig_50243
TAGAGTATTTTTTTTCTTGAGTATATTTAGTCTTTCAAATGCCCAAGTTTTGTAGAATAAGTTCCATACATAAACACAAGCATACTATACCCTCGACTTTACCACATCGCTCTTATATATTCAAACTTATAAAGATTTAAAATGCACATGCAAAAATGTTCCTGAGAATATTTTTGACTTTGATCTGACCTTCGTCATTGTGCTCGATGACATCTTGTCTTGTTTGCTGCTACCTCATTCTA
